# Supplementary material
Source: publisher figshare collection journal article supplement (https://acs.figshare.com/ndownloader/files/5336083)
Supplement: Supplementary file 1 [file 5336083]

 
data_xb0071m 
 
_audit_creation_method            SHELXL-97 
_chemical_name_systematic 
; 
 ? 
; 
_chemical_name_common             ? 
_chemical_melting_point           ? 
_chemical_formula_moiety          ? 
_chemical_formula_sum 
 'Cu H140 Mo36 N22 O172 Sb12'

_chemical_formula_weight          8179.66
 
loop_ 
 _atom_type_symbol 
 _atom_type_description 
 _atom_type_scat_dispersion_real 
 _atom_type_scat_dispersion_imag 
 _atom_type_scat_source 
 'H'  'H'   0.0000   0.0000 
 'International Tables Vol C Tables 4.2.6.8 and 6.1.1.4' 
 'N'  'N'   0.0061   0.0033 
 'International Tables Vol C Tables 4.2.6.8 and 6.1.1.4' 
 'O'  'O'   0.0106   0.0060 
 'International Tables Vol C Tables 4.2.6.8 and 6.1.1.4' 
 'Mo'  'Mo'  -1.6832   0.6857 
 'International Tables Vol C Tables 4.2.6.8 and 6.1.1.4' 
 'Sb'  'Sb'  -0.5866   1.5461 
 'International Tables Vol C Tables 4.2.6.8 and 6.1.1.4' 
 'Cu'  'Cu'   0.3201   1.2651 
 'International Tables Vol C Tables 4.2.6.8 and 6.1.1.4' 
 
_symmetry_cell_setting           Triclinic

_symmetry_space_group_name_H-M    P-1 
 
loop_ 
 _symmetry_equiv_pos_as_xyz 
 'x, y, z' 
 '-x, -y, -z' 
 
_cell_length_a                    13.7778(17) 
_cell_length_b                    17.945(2) 
_cell_length_c                    19.818(3) 
_cell_angle_alpha                 69.621(2) 
_cell_angle_beta                  82.432(2) 
_cell_angle_gamma                 69.481(2) 
_cell_volume                      4301.4(9) 
_cell_formula_units_Z             1 
_cell_measurement_temperature     293(2) 
_cell_measurement_reflns_used     ? 
_cell_measurement_theta_min       ? 
_cell_measurement_theta_max       ? 
 
_exptl_crystal_description         block 
_exptl_crystal_colour             green 
_exptl_crystal_size_max           0.26 
_exptl_crystal_size_mid           0.23
_exptl_crystal_size_min           0.16 
_exptl_crystal_density_meas       ? 
_exptl_crystal_density_diffrn     3.157  
_exptl_crystal_density_method     'not measured' 
_exptl_crystal_F_000              3910 
_exptl_absorpt_coefficient_mu     4.681 
_exptl_absorpt_correction_type    'multi-scan'

_exptl_absorpt_correction_T_min   0.308

_exptl_absorpt_correction_T_max   0.473

_exptl_absorpt_process_details     'SADABS(Bruker,1996)' 
 
_exptl_special_details 
; 
 ? 
; 
 
_diffrn_ambient_temperature       293(2) 
_diffrn_radiation_wavelength      0.71073 
_diffrn_radiation_type            MoK\a 
_diffrn_radiation_source          'fine-focus sealed tube' 
_diffrn_radiation_monochromator   graphite 
_diffrn_measurement_device_type   'CCD area detector'

_diffrn_measurement_method        'phi and omega scans'

_diffrn_detector_area_resol_mean  ?

_diffrn_standards_number          0

_diffrn_standards_interval_count  0

_diffrn_standards_interval_time   0

_diffrn_standards_decay_%         0
_diffrn_reflns_number             22018 
_diffrn_reflns_av_R_equivalents   0.0201 
_diffrn_reflns_av_sigmaI/netI     0.0397 
_diffrn_reflns_limit_h_min        -16 
_diffrn_reflns_limit_h_max        14 
_diffrn_reflns_limit_k_min        -21 
_diffrn_reflns_limit_k_max        20 
_diffrn_reflns_limit_l_min        -22 
_diffrn_reflns_limit_l_max        23 
_diffrn_reflns_theta_min          1.75 
_diffrn_reflns_theta_max          25.10 
_reflns_number_total              15065 
_reflns_number_gt                 12106 
_reflns_threshold_expression      >2sigma(I) 
 
_computing_data_collection        'Bruker SMART'

_computing_cell_refinement        'Bruker SMART'

_computing_data_reduction         'Bruker SAINT'

_computing_structure_solution     'SHELXS-97 (Sheldrick, 1990)'

_computing_structure_refinement   'SHELXL-97 (Sheldrick, 1997)'

_computing_molecular_graphics     'Bruker SHELXTL'

_computing_publication_material   'Bruker SHELXTL'
 
_refine_special_details 
; 
 Refinement of F^2^ against ALL reflections.  The weighted R-factor wR and 
 goodness of fit S are based on F^2^, conventional R-factors R are based 
 on F, with F set to zero for negative F^2^. The threshold expression of 
 F^2^ > 2sigma(F^2^) is used only for calculating R-factors(gt) etc. and is 
 not relevant to the choice of reflections for refinement.  R-factors based 
 on F^2^ are statistically about twice as large as those based on F, and R- 
 factors based on ALL data will be even larger. 
; 
 
_refine_ls_structure_factor_coef  Fsqd  
_refine_ls_matrix_type            full 
_refine_ls_weighting_scheme       calc  
_refine_ls_weighting_details 
 'calc w=1/[\s^2^(Fo^2^)+(0.0858P)^2^+9.1735P] where P=(Fo^2^+2Fc^2^)/3' 
_atom_sites_solution_primary      direct 
_atom_sites_solution_secondary    difmap 
_atom_sites_solution_hydrogens    none 
_refine_ls_hydrogen_treatment     none 
_refine_ls_extinction_method      none 
_refine_ls_extinction_coef        ? 
_refine_ls_number_reflns          15065 
_refine_ls_number_parameters      978 
_refine_ls_number_restraints      1 
_refine_ls_R_factor_all           0.0562 
_refine_ls_R_factor_gt            0.0460 
_refine_ls_wR_factor_ref          0.1590 
_refine_ls_wR_factor_gt           0.1535 
_refine_ls_goodness_of_fit_ref    1.242 
_refine_ls_restrained_S_all       1.263 
_refine_ls_shift/su_max           0.001 
_refine_ls_shift/su_mean          0.000 
 
loop_ 
 _atom_site_label 
 _atom_site_type_symbol 
 _atom_site_fract_x 
 _atom_site_fract_y 
 _atom_site_fract_z 
 _atom_site_U_iso_or_equiv 
 _atom_site_adp_type 
 _atom_site_occupancy 
 _atom_site_symmetry_multiplicity 
 _atom_site_calc_flag 
 _atom_site_refinement_flags 
 _atom_site_disorder_assembly 
 _atom_site_disorder_group 
Mo1 Mo 0.25844(7) 0.20516(6) 0.41880(5) 0.0349(2) Uani 1 1 d . . . 
Mo2 Mo 0.02605(7) 0.17598(6) 0.46150(5) 0.0395(2) Uani 1 1 d . . . 
Mo3 Mo 0.37150(6) 0.24366(5) 0.53069(4) 0.0288(2) Uani 1 1 d . . . 
Mo4 Mo -0.08032(6) 0.18187(5) 0.61602(4) 0.02686(19) Uani 1 1 d . . . 
Mo5 Mo 0.18836(6) 0.36797(5) 0.63796(4) 0.02152(18) Uani 1 1 d . . . 
Mo6 Mo -0.03754(6) 0.34325(5) 0.67614(4) 0.02326(18) Uani 1 1 d . . . 
Mo7 Mo 0.21885(7) 0.53136(5) 0.72051(5) 0.0348(2) Uani 1 1 d . . . 
Mo8 Mo -0.00586(7) 0.50811(5) 0.75456(4) 0.0305(2) Uani 1 1 d . . . 
Mo9 Mo 0.43339(7) 0.38030(6) 0.84701(5) 0.0335(2) Uani 1 1 d . . . 
Mo10 Mo -0.01944(6) 0.32552(5) 0.91456(4) 0.02349(18) Uani 1 1 d . . . 
Mo11 Mo 0.39981(6) 0.22253(5) 0.77131(4) 0.02237(18) Uani 1 1 d . . . 
Mo12 Mo -0.04785(6) 0.16362(5) 0.84716(4) 0.02289(18) Uani 1 1 d . . . 
Mo13 Mo 0.37411(6) 0.05765(5) 0.70528(4) 0.02190(18) Uani 1 1 d . . . 
Mo14 Mo -0.08129(7) -0.00369(5) 0.78097(4) 0.0289(2) Uani 1 1 d . . . 
Mo15 Mo 0.36177(7) -0.12787(5) 0.79485(5) 0.0375(2) Uani 1 1 d . . . 
Mo16 Mo 0.13137(7) -0.15856(5) 0.82714(5) 0.0360(2) Uani 1 1 d . . . 
Mo17 Mo 0.36992(7) 0.29203(6) 1.01230(5) 0.0368(2) Uani 1 1 d . . . 
Mo18 Mo 0.13902(7) 0.26201(5) 1.04941(4) 0.0308(2) Uani 1 1 d . . . 
Cu1 Cu 0.0000 0.5000 0.5000 0.0683(7) Uani 1 2 d SD . . 
Sb1 Sb 0.15213(5) 0.20072(4) 0.58464(3) 0.02168(15) Uani 1 1 d . . . 
Sb2 Sb 0.14202(4) 0.03802(3) 0.74945(3) 0.02054(15) Uani 1 1 d . . . 
Sb3 Sb 0.17381(4) 0.19512(3) 0.80873(3) 0.01801(14) Uani 1 1 d . . . 
Sb4 Sb 0.21124(5) 0.34273(4) 0.87596(3) 0.02255(15) Uani 1 1 d . . . 
Sb5 Sb 0.36116(5) 0.11926(4) 0.95543(3) 0.02814(16) Uani 1 1 d . . . 
Sb6 Sb 0.11023(5) 0.09282(4) 0.99985(3) 0.03036(17) Uani 1 1 d . . . 
O1 O 0.2964(6) 0.1211(5) 0.3891(4) 0.051(2) Uani 1 1 d . . . 
O2 O 0.2848(6) 0.2841(5) 0.3489(4) 0.054(2) Uani 1 1 d . . . 
O3 O 0.0697(6) 0.0933(6) 0.4286(5) 0.056(2) Uani 1 1 d . . . 
O4 O -0.0902(6) 0.2363(6) 0.4213(4) 0.054(2) Uani 1 1 d . . . 
O5 O 0.1091(6) 0.2422(5) 0.4059(4) 0.0420(18) Uani 1 1 d . . . 
O6 O -0.1947(5) 0.2347(4) 0.5736(4) 0.0364(16) Uani 1 1 d . . . 
O7 O 0.0149(5) 0.2406(4) 0.5386(3) 0.0275(14) Uani 1 1 d . . . 
O8 O 0.2116(5) 0.2694(4) 0.5014(3) 0.0251(14) Uani 1 1 d . . . 
O9 O 0.3987(6) 0.3224(4) 0.4602(4) 0.0425(18) Uani 1 1 d . . . 
O10 O -0.0726(5) 0.4200(4) 0.5895(3) 0.0340(16) Uani 1 1 d D . . 
O11 O 0.1293(5) 0.4460(4) 0.5597(3) 0.0340(16) Uani 1 1 d . . . 
O12 O 0.2706(6) 0.5771(5) 0.6398(4) 0.048(2) Uani 1 1 d . . . 
O13 O 0.0838(5) 0.5510(4) 0.6828(4) 0.0348(16) Uani 1 1 d . . . 
O14 O -0.1080(5) 0.5346(4) 0.7000(4) 0.0397(17) Uani 1 1 d . . . 
O15 O -0.0447(6) 0.5814(4) 0.7980(4) 0.0470(19) Uani 1 1 d . . . 
O16 O 0.1783(6) 0.6095(5) 0.7597(4) 0.050(2) Uani 1 1 d . . . 
O17 O -0.1363(5) 0.3724(4) 0.7323(3) 0.0303(15) Uani 1 1 d . . . 
O18 O 0.0604(5) 0.3880(3) 0.6982(3) 0.0232(13) Uani 1 1 d . . . 
O19 O 0.2464(5) 0.4204(4) 0.6695(3) 0.0302(15) Uani 1 1 d . . . 
O20 O 0.3000(5) 0.3067(4) 0.5942(3) 0.0278(14) Uani 1 1 d . . . 
O21 O 0.1109(5) 0.2849(4) 0.6327(3) 0.0238(13) Uani 1 1 d . . . 
O22 O -0.0815(5) 0.2567(4) 0.6602(3) 0.0248(13) Uani 1 1 d . . . 
O23 O -0.0241(5) 0.1133(4) 0.5531(4) 0.0351(16) Uani 1 1 d . . . 
O24 O 0.1859(5) 0.1251(4) 0.5216(3) 0.0284(14) Uani 1 1 d . . . 
O25 O 0.3780(5) 0.1684(4) 0.4790(4) 0.0352(16) Uani 1 1 d . . . 
O26 O -0.1051(5) 0.0986(4) 0.6907(4) 0.0342(16) Uani 1 1 d . . . 
O27 O 0.0889(5) 0.1222(4) 0.6570(3) 0.0254(14) Uani 1 1 d . . . 
O28 O 0.2930(5) 0.1444(4) 0.6238(3) 0.0259(14) Uani 1 1 d . . . 
O29 O 0.4868(5) 0.1862(4) 0.5737(4) 0.0393(17) Uani 1 1 d . . . 
O30 O 0.4514(5) 0.2782(4) 0.6973(3) 0.0320(15) Uani 1 1 d . . . 
O31 O 0.2500(4) 0.2579(4) 0.7340(3) 0.0223(13) Uani 1 1 d . . . 
O32 O 0.0345(4) 0.2317(4) 0.7715(3) 0.0223(13) Uani 1 1 d . . . 
O33 O -0.1664(5) 0.2099(4) 0.8113(4) 0.0344(16) Uani 1 1 d . . . 
O34 O -0.0422(5) 0.4180(4) 0.8344(3) 0.0306(15) Uani 1 1 d . . . 
O35 O 0.1492(5) 0.4452(4) 0.7990(3) 0.0273(14) Uani 1 1 d . . . 
O36 O 0.3425(6) 0.4614(4) 0.7713(4) 0.0415(18) Uani 1 1 d . . . 
O37 O 0.4732(6) 0.4450(5) 0.8749(4) 0.049(2) Uani 1 1 d . . . 
O38 O 0.2907(5) 0.3904(4) 0.9139(3) 0.0316(15) Uani 1 1 d . . . 
O39 O 0.0925(5) 0.3611(4) 0.9442(3) 0.0255(14) Uani 1 1 d . . . 
O40 O -0.1125(5) 0.3623(4) 0.9713(3) 0.0349(16) Uani 1 1 d . . . 
O41 O -0.0678(5) 0.2596(4) 0.8888(3) 0.0264(14) Uani 1 1 d . . . 
O42 O 0.1299(5) 0.2844(3) 0.8533(3) 0.0233(13) Uani 1 1 d . . . 
O43 O 0.3404(5) 0.3048(4) 0.8209(3) 0.0300(15) Uani 1 1 d . . . 
O44 O 0.5361(6) 0.3388(5) 0.7976(4) 0.0479(19) Uani 1 1 d . . . 
O45 O 0.4191(5) 0.1242(4) 0.7322(3) 0.0277(14) Uani 1 1 d . . . 
O46 O 0.2199(5) 0.1035(4) 0.7665(3) 0.0231(13) Uani 1 1 d . . . 
O47 O 0.0119(5) 0.0773(4) 0.8021(3) 0.0272(14) Uani 1 1 d . . . 
O48 O -0.1822(5) 0.0420(5) 0.8300(4) 0.0402(17) Uani 1 1 d . . . 
O49 O -0.1275(6) -0.0585(5) 0.7454(4) 0.0433(18) Uani 1 1 d . . . 
O50 O 0.0751(5) -0.0359(4) 0.7368(3) 0.0270(14) Uani 1 1 d . . . 
O51 O 0.2769(5) -0.0105(4) 0.7049(3) 0.0276(14) Uani 1 1 d . . . 
O52 O 0.4749(5) 0.0137(4) 0.6570(4) 0.0360(16) Uani 1 1 d . . . 
O53 O 0.4623(6) -0.1693(5) 0.7432(5) 0.062(2) Uani 1 1 d . . . 
O54 O 0.2612(6) -0.1691(4) 0.7742(4) 0.0402(17) Uani 1 1 d . . . 
O55 O 0.0894(6) -0.2150(5) 0.7913(5) 0.051(2) Uani 1 1 d . . . 
O56 O -0.0008(5) -0.0906(4) 0.8574(4) 0.0366(16) Uani 1 1 d . . . 
O57 O 0.2004(5) -0.0596(4) 0.8378(3) 0.0291(15) Uani 1 1 d . . . 
O58 O 0.4014(5) -0.0331(4) 0.7945(3) 0.0305(15) Uani 1 1 d . . . 
O59 O 0.5032(5) 0.1598(4) 0.8270(4) 0.0321(15) Uani 1 1 d . . . 
O60 O 0.3109(5) 0.1493(4) 0.8571(3) 0.0252(14) Uani 1 1 d . . . 
O61 O 0.1097(4) 0.1272(4) 0.8914(3) 0.0219(13) Uani 1 1 d . . . 
O62 O -0.0675(5) 0.1019(4) 0.9330(4) 0.0374(16) Uani 1 1 d . . . 
O63 O 0.0688(5) 0.2198(4) 0.9944(3) 0.0321(15) Uani 1 1 d . . . 
O64 O 0.2730(5) 0.2373(4) 0.9616(3) 0.0269(14) Uani 1 1 d . . . 
O65 O 0.4669(6) 0.2797(4) 0.9335(4) 0.0431(18) Uani 1 1 d . . . 
O66 O 0.4126(6) 0.3524(5) 1.0441(4) 0.054(2) Uani 1 1 d . . . 
O67 O 0.2281(6) 0.3202(4) 1.0518(3) 0.0378(17) Uani 1 1 d . . . 
O68 O 0.0359(6) 0.3097(5) 1.0950(4) 0.0445(18) Uani 1 1 d . . . 
O69 O 0.1988(6) 0.1640(4) 1.1079(4) 0.0435(19) Uani 1 1 d . . . 
O70 O 0.4183(6) 0.1893(5) 1.0683(4) 0.051(2) Uani 1 1 d . . . 
O71 O 0.1761(7) -0.2238(5) 0.9110(5) 0.063(3) Uani 1 1 d . . . 
O72 O 0.3907(6) -0.1886(5) 0.8829(5) 0.060(2) Uani 1 1 d . . . 
O73 O 0.2593(5) 0.0699(4) 1.0070(3) 0.0369(17) Uani 1 1 d . . . 
O74 O 0.0487(6) 0.4153(5) 0.4505(4) 0.049(2) Uani 1 1 d . . . 
O101 O 0.1990(6) 0.9478(5) 0.9687(4) 0.0458(19) Uiso 1 1 d . . . 
O102 O 0.4362(7) 0.9809(5) 0.9221(5) 0.057(2) Uiso 1 1 d . . . 
O103 O 0.9041(9) 0.7652(7) 0.7444(6) 0.089(3) Uiso 1 1 d . . . 
O104 O 0.2863(9) 0.9627(7) 0.5756(6) 0.085(3) Uiso 1 1 d . . . 
O105 O 0.6480(8) 0.1115(6) 0.6812(5) 0.071(3) Uiso 1 1 d . . . 
O106 O 0.6765(9) 0.2426(7) 0.7147(6) 0.091(3) Uiso 1 1 d . . . 
O107 O 0.3624(9) 0.0169(7) 0.1827(6) 0.090(3) Uiso 1 1 d . . . 
O108 O 0.1060(9) 0.9259(7) 0.6130(6) 0.093(3) Uiso 1 1 d . . . 
O109 O 0.2587(9) 0.7457(7) 0.6720(6) 0.092(3) Uiso 1 1 d . . . 
O110 O 0.7043(10) 0.3937(8) 0.8373(7) 0.109(4) Uiso 1 1 d . . . 
O111 O 0.6407(13) 0.1397(10) 0.9367(9) 0.140(5) Uiso 1 1 d . . . 
O112 O 0.7745(11) 0.0586(9) 0.5708(7) 0.117(4) Uiso 1 1 d . . . 
O113 O 0.3250(10) 0.1569(8) 0.2341(7) 0.100(4) Uiso 1 1 d . . . 
O114 O 0.3051(12) 0.4645(10) 0.3412(8) 0.136(5) Uiso 1 1 d . . . 
O115 O 0.1849(16) 0.5728(13) 0.9036(11) 0.191(8) Uiso 1 1 d . . . 
O116 O 0.435(2) 0.4347(18) 0.5739(15) 0.265(12) Uiso 1 1 d . . . 
O117 O 0.6656(17) 0.2235(14) 0.4752(12) 0.201(8) Uiso 1 1 d . . . 
O118 O 0.5000 1.0000 0.5000 0.188(11) Uiso 1 2 d S . . 
O119 O 0.3244(13) 0.7042(11) 0.0208(9) 0.144(6) Uiso 1 1 d . . . 
O120 O 0.2255(19) 0.4537(16) 0.1052(13) 0.233(10) Uiso 1 1 d . . . 
O121 O 0.1706(17) 0.6045(14) 0.5178(12) 0.200(8) Uiso 1 1 d . . . 
O122 O 0.3300(18) 0.5926(15) 0.3962(12) 0.214(9) Uiso 1 1 d . . . 
O123 O 0.461(2) 0.7624(18) 0.6384(15) 0.257(12) Uiso 1 1 d . . . 
 
loop_ 
 _atom_site_aniso_label 
 _atom_site_aniso_U_11 
 _atom_site_aniso_U_22 
 _atom_site_aniso_U_33 
 _atom_site_aniso_U_23 
 _atom_site_aniso_U_13 
 _atom_site_aniso_U_12 
Mo1 0.0368(5) 0.0426(5) 0.0241(4) -0.0150(4) 0.0001(4) -0.0078(4) 
Mo2 0.0371(5) 0.0551(6) 0.0341(5) -0.0264(4) -0.0062(4) -0.0104(4) 
Mo3 0.0271(4) 0.0325(4) 0.0262(4) -0.0107(4) 0.0013(3) -0.0085(4) 
Mo4 0.0248(4) 0.0321(4) 0.0249(4) -0.0087(3) -0.0047(3) -0.0098(3) 
Mo5 0.0242(4) 0.0185(4) 0.0198(4) -0.0038(3) -0.0041(3) -0.0056(3) 
Mo6 0.0220(4) 0.0221(4) 0.0206(4) -0.0047(3) -0.0027(3) -0.0025(3) 
Mo7 0.0437(5) 0.0240(4) 0.0366(5) -0.0054(4) -0.0027(4) -0.0147(4) 
Mo8 0.0342(5) 0.0244(4) 0.0265(4) -0.0042(3) -0.0051(4) -0.0043(4) 
Mo9 0.0332(5) 0.0344(5) 0.0400(5) -0.0157(4) -0.0035(4) -0.0147(4) 
Mo10 0.0265(4) 0.0233(4) 0.0197(4) -0.0087(3) -0.0009(3) -0.0051(3) 
Mo11 0.0209(4) 0.0230(4) 0.0250(4) -0.0086(3) -0.0036(3) -0.0074(3) 
Mo12 0.0231(4) 0.0247(4) 0.0222(4) -0.0081(3) 0.0010(3) -0.0095(3) 
Mo13 0.0217(4) 0.0188(4) 0.0240(4) -0.0069(3) -0.0032(3) -0.0043(3) 
Mo14 0.0308(5) 0.0318(4) 0.0296(4) -0.0106(4) 0.0015(3) -0.0168(4) 
Mo15 0.0326(5) 0.0185(4) 0.0552(6) -0.0056(4) -0.0065(4) -0.0053(4) 
Mo16 0.0404(5) 0.0243(4) 0.0424(5) -0.0044(4) -0.0034(4) -0.0148(4) 
Mo17 0.0437(5) 0.0366(5) 0.0338(5) -0.0094(4) -0.0148(4) -0.0145(4) 
Mo18 0.0436(5) 0.0317(4) 0.0178(4) -0.0061(3) -0.0058(4) -0.0131(4) 
Cu1 0.0732(17) 0.0632(15) 0.0622(15) -0.0145(12) -0.0131(13) -0.0163(13) 
Sb1 0.0239(3) 0.0219(3) 0.0190(3) -0.0063(2) -0.0030(2) -0.0065(2) 
Sb2 0.0226(3) 0.0184(3) 0.0212(3) -0.0059(2) -0.0025(2) -0.0072(2) 
Sb3 0.0203(3) 0.0170(3) 0.0166(3) -0.0050(2) -0.0029(2) -0.0054(2) 
Sb4 0.0280(3) 0.0201(3) 0.0205(3) -0.0066(2) -0.0046(2) -0.0076(2) 
Sb5 0.0324(4) 0.0246(3) 0.0245(3) -0.0040(3) -0.0116(3) -0.0057(3) 
Sb6 0.0383(4) 0.0296(3) 0.0209(3) -0.0022(3) -0.0027(3) -0.0133(3) 
O1 0.052(5) 0.057(5) 0.056(5) -0.040(4) 0.008(4) -0.012(4) 
O2 0.055(5) 0.068(6) 0.029(4) -0.005(4) 0.001(4) -0.021(4) 
O3 0.053(5) 0.077(6) 0.066(6) -0.057(5) 0.009(4) -0.026(5) 
O4 0.050(5) 0.072(6) 0.040(4) -0.016(4) -0.015(4) -0.015(4) 
O5 0.042(4) 0.055(5) 0.025(4) -0.011(3) -0.006(3) -0.010(4) 
O6 0.028(4) 0.043(4) 0.038(4) -0.011(3) -0.009(3) -0.010(3) 
O7 0.031(4) 0.033(3) 0.018(3) -0.003(3) -0.008(3) -0.011(3) 
O8 0.029(3) 0.026(3) 0.018(3) -0.005(3) 0.001(3) -0.010(3) 
O9 0.051(5) 0.040(4) 0.033(4) -0.006(3) 0.003(3) -0.019(4) 
O10 0.033(4) 0.032(4) 0.029(4) -0.006(3) -0.011(3) -0.001(3) 
O11 0.046(4) 0.025(3) 0.028(3) 0.001(3) -0.016(3) -0.012(3) 
O12 0.047(5) 0.038(4) 0.052(5) -0.001(4) -0.002(4) -0.018(4) 
O13 0.041(4) 0.025(3) 0.031(4) -0.002(3) -0.006(3) -0.007(3) 
O14 0.036(4) 0.033(4) 0.034(4) -0.001(3) -0.011(3) 0.001(3) 
O15 0.062(5) 0.028(4) 0.042(4) -0.011(3) -0.002(4) -0.005(4) 
O16 0.062(5) 0.032(4) 0.059(5) -0.019(4) -0.005(4) -0.015(4) 
O17 0.028(4) 0.031(3) 0.028(3) -0.007(3) -0.001(3) -0.006(3) 
O18 0.031(3) 0.015(3) 0.021(3) -0.005(2) -0.006(3) -0.003(3) 
O19 0.034(4) 0.025(3) 0.034(4) -0.012(3) -0.001(3) -0.011(3) 
O20 0.027(3) 0.030(3) 0.024(3) -0.008(3) 0.002(3) -0.010(3) 
O21 0.029(3) 0.024(3) 0.021(3) -0.010(3) -0.001(3) -0.008(3) 
O22 0.027(3) 0.025(3) 0.024(3) -0.008(3) 0.000(3) -0.010(3) 
O23 0.036(4) 0.037(4) 0.042(4) -0.022(3) -0.001(3) -0.015(3) 
O24 0.036(4) 0.034(4) 0.022(3) -0.016(3) -0.002(3) -0.012(3) 
O25 0.032(4) 0.036(4) 0.040(4) -0.022(3) 0.002(3) -0.004(3) 
O26 0.038(4) 0.032(4) 0.033(4) -0.008(3) -0.008(3) -0.012(3) 
O27 0.024(3) 0.023(3) 0.026(3) -0.002(3) -0.006(3) -0.008(3) 
O28 0.025(3) 0.029(3) 0.023(3) -0.006(3) -0.006(3) -0.010(3) 
O29 0.028(4) 0.045(4) 0.043(4) -0.017(3) -0.003(3) -0.005(3) 
O30 0.034(4) 0.035(4) 0.028(3) -0.007(3) 0.001(3) -0.015(3) 
O31 0.023(3) 0.023(3) 0.021(3) -0.005(3) -0.002(2) -0.008(3) 
O32 0.022(3) 0.025(3) 0.018(3) -0.005(3) -0.001(2) -0.008(3) 
O33 0.025(4) 0.038(4) 0.044(4) -0.019(3) -0.002(3) -0.008(3) 
O34 0.027(4) 0.029(3) 0.029(3) -0.007(3) -0.003(3) -0.003(3) 
O35 0.036(4) 0.017(3) 0.024(3) -0.003(3) -0.004(3) -0.005(3) 
O36 0.048(5) 0.040(4) 0.041(4) -0.007(3) -0.004(3) -0.025(4) 
O37 0.052(5) 0.047(4) 0.064(5) -0.028(4) -0.005(4) -0.024(4) 
O38 0.033(4) 0.032(4) 0.035(4) -0.016(3) -0.007(3) -0.009(3) 
O39 0.033(4) 0.023(3) 0.021(3) -0.009(3) -0.002(3) -0.008(3) 
O40 0.046(4) 0.032(4) 0.026(3) -0.014(3) 0.009(3) -0.011(3) 
O41 0.029(3) 0.031(3) 0.023(3) -0.016(3) 0.002(3) -0.010(3) 
O42 0.030(3) 0.017(3) 0.024(3) -0.006(2) -0.003(3) -0.007(3) 
O43 0.036(4) 0.027(3) 0.034(4) -0.015(3) -0.001(3) -0.013(3) 
O44 0.034(4) 0.058(5) 0.062(5) -0.034(4) 0.009(4) -0.017(4) 
O45 0.029(3) 0.029(3) 0.025(3) -0.009(3) -0.006(3) -0.008(3) 
O46 0.025(3) 0.022(3) 0.023(3) -0.007(3) -0.002(3) -0.008(3) 
O47 0.029(4) 0.026(3) 0.032(3) -0.013(3) 0.003(3) -0.013(3) 
O48 0.032(4) 0.047(4) 0.047(4) -0.021(4) 0.007(3) -0.017(3) 
O49 0.056(5) 0.047(4) 0.043(4) -0.016(4) -0.001(4) -0.035(4) 
O50 0.034(4) 0.026(3) 0.025(3) -0.009(3) 0.001(3) -0.015(3) 
O51 0.024(3) 0.030(3) 0.032(4) -0.014(3) -0.001(3) -0.009(3) 
O52 0.034(4) 0.033(4) 0.040(4) -0.019(3) 0.002(3) -0.004(3) 
O53 0.047(5) 0.043(5) 0.107(7) -0.043(5) 0.018(5) -0.015(4) 
O54 0.045(4) 0.030(4) 0.051(4) -0.018(3) 0.006(4) -0.017(3) 
O55 0.055(5) 0.044(4) 0.068(5) -0.024(4) 0.004(4) -0.029(4) 
O56 0.042(4) 0.041(4) 0.029(4) -0.008(3) 0.003(3) -0.020(3) 
O57 0.033(4) 0.022(3) 0.030(3) -0.001(3) -0.004(3) -0.013(3) 
O58 0.031(4) 0.022(3) 0.033(4) 0.000(3) -0.009(3) -0.008(3) 
O59 0.023(3) 0.034(4) 0.040(4) -0.015(3) -0.009(3) -0.004(3) 
O60 0.029(3) 0.024(3) 0.022(3) -0.004(3) -0.008(3) -0.009(3) 
O61 0.025(3) 0.022(3) 0.018(3) -0.003(2) -0.002(2) -0.010(3) 
O62 0.040(4) 0.040(4) 0.033(4) -0.011(3) 0.011(3) -0.019(3) 
O63 0.040(4) 0.023(3) 0.030(4) -0.007(3) -0.006(3) -0.007(3) 
O64 0.028(3) 0.025(3) 0.028(3) -0.006(3) -0.007(3) -0.009(3) 
O65 0.046(4) 0.038(4) 0.044(4) -0.007(3) -0.014(3) -0.014(3) 
O66 0.060(5) 0.060(5) 0.058(5) -0.030(4) -0.013(4) -0.025(4) 
O67 0.051(5) 0.040(4) 0.027(4) -0.014(3) -0.003(3) -0.016(3) 
O68 0.055(5) 0.056(5) 0.026(4) -0.016(3) -0.002(3) -0.018(4) 
O69 0.066(5) 0.036(4) 0.030(4) -0.003(3) -0.013(4) -0.021(4) 
O70 0.059(5) 0.045(4) 0.044(4) -0.001(4) -0.023(4) -0.016(4) 
O71 0.059(6) 0.052(5) 0.062(5) 0.017(4) -0.014(4) -0.029(4) 
O72 0.050(5) 0.041(4) 0.074(6) 0.012(4) -0.029(4) -0.020(4) 
O73 0.048(4) 0.032(4) 0.025(3) 0.004(3) -0.013(3) -0.015(3) 
O74 0.068(5) 0.039(4) 0.027(4) -0.010(3) -0.003(4) -0.001(4) 
 
_geom_special_details 
; 
 All esds (except the esd in the dihedral angle between two l.s. planes) 
 are estimated using the full covariance matrix.  The cell esds are taken 
 into account individually in the estimation of esds in distances, angles 
 and torsion angles; correlations between esds in cell parameters are only 
 used when they are defined by crystal symmetry.  An approximate (isotropic) 
 treatment of cell esds is used for estimating esds involving l.s. planes. 
; 
 
loop_ 
 _geom_bond_atom_site_label_1 
 _geom_bond_atom_site_label_2 
 _geom_bond_distance 
 _geom_bond_site_symmetry_2 
 _geom_bond_publ_flag 
Mo1 O1 1.696(7) . ? 
Mo1 O2 1.708(8) . ? 
Mo1 O25 1.944(7) . ? 
Mo1 O5 1.950(7) . ? 
Mo1 O8 2.222(6) . ? 
Mo1 O24 2.376(6) . ? 
Mo2 O4 1.700(8) . ? 
Mo2 O3 1.712(8) . ? 
Mo2 O5 1.909(7) . ? 
Mo2 O23 1.957(7) . ? 
Mo2 O7 2.179(6) . ? 
Mo2 O24 2.372(6) . ? 
Mo3 O29 1.706(7) . ? 
Mo3 O9 1.716(7) . ? 
Mo3 O20 1.928(6) . ? 
Mo3 O25 1.932(7) . ? 
Mo3 O8 2.201(6) . ? 
Mo3 O28 2.507(6) . ? 
Mo4 O6 1.685(6) . ? 
Mo4 O26 1.796(6) . ? 
Mo4 O22 1.836(6) . ? 
Mo4 O23 1.953(7) . ? 
Mo4 O7 2.121(6) . ? 
Mo4 O27 2.321(6) . ? 
Mo5 O19 1.728(6) . ? 
Mo5 O11 1.747(6) . ? 
Mo5 O20 1.859(6) . ? 
Mo5 O18 1.991(6) . ? 
Mo5 O21 2.150(6) . ? 
Mo5 O31 2.208(6) . ? 
Mo6 O17 1.694(6) . ? 
Mo6 O10 1.785(6) . ? 
Mo6 O18 1.953(6) . ? 
Mo6 O22 1.982(6) . ? 
Mo6 O21 2.165(6) . ? 
Mo6 O32 2.244(6) . ? 
Mo7 O12 1.713(8) . ? 
Mo7 O16 1.725(8) . ? 
Mo7 O36 1.887(7) . ? 
Mo7 O13 1.967(7) . ? 
Mo7 O35 2.168(6) . ? 
Mo7 O19 2.429(6) . ? 
Mo8 O15 1.712(7) . ? 
Mo8 O14 1.717(7) . ? 
Mo8 O13 1.893(7) . ? 
Mo8 O34 1.986(6) . ? 
Mo8 O35 2.174(6) . ? 
Mo9 O44 1.709(8) . ? 
Mo9 O37 1.710(7) . ? 
Mo9 O36 1.907(7) . ? 
Mo9 O65 1.969(7) . ? 
Mo9 O38 2.211(7) . ? 
Mo9 O43 2.372(6) . ? 
Mo10 O40 1.699(7) . ? 
Mo10 O41 1.780(6) . ? 
Mo10 O34 1.819(6) . ? 
Mo10 O39 2.078(6) . ? 
Mo10 O63 2.093(6) . ? 
Mo10 O42 2.271(6) . ? 
Mo10 Sb4 3.2657(10) . ? 
Mo11 O30 1.690(6) . ? 
Mo11 O59 1.714(6) . ? 
Mo11 O43 1.941(6) . ? 
Mo11 O45 2.087(6) . ? 
Mo11 O31 2.090(6) . ? 
Mo11 O60 2.267(6) . ? 
Mo12 O33 1.675(6) . ? 
Mo12 O62 1.724(6) . ? 
Mo12 O47 1.936(6) . ? 
Mo12 O32 2.067(6) . ? 
Mo12 O41 2.079(6) . ? 
Mo12 O61 2.239(6) . ? 
Mo12 Sb3 3.2440(10) . ? 
Mo13 O52 1.695(7) . ? 
Mo13 O45 1.773(6) . ? 
Mo13 O58 1.913(6) . ? 
Mo13 O28 1.945(6) . ? 
Mo13 O51 2.109(6) . ? 
Mo13 O46 2.335(6) . ? 
Mo14 O49 1.706(7) . ? 
Mo14 O48 1.717(7) . ? 
Mo14 O56 1.882(7) . ? 
Mo14 O26 2.030(6) . ? 
Mo14 O50 2.174(6) . ? 
Mo14 O47 2.410(6) . ? 
Mo15 O72 1.716(8) . ? 
Mo15 O53 1.719(8) . ? 
Mo15 O54 1.927(7) . ? 
Mo15 O58 1.958(6) . ? 
Mo15 O51 2.278(6) . ? 
Mo15 O57 2.342(7) . ? 
Mo16 O55 1.698(7) . ? 
Mo16 O71 1.710(8) . ? 
Mo16 O54 1.934(7) . ? 
Mo16 O56 1.956(7) . ? 
Mo16 O50 2.253(6) . ? 
Mo16 O57 2.367(6) . ? 
Mo17 O66 1.715(7) . ? 
Mo17 O70 1.727(7) . ? 
Mo17 O65 1.938(8) . ? 
Mo17 O67 1.966(7) . ? 
Mo17 O38 2.219(6) . ? 
Mo17 O64 2.391(6) . ? 
Mo18 O68 1.707(8) . ? 
Mo18 O69 1.712(7) . ? 
Mo18 O67 1.884(7) . ? 
Mo18 O63 2.017(6) . ? 
Mo18 O39 2.212(6) . ? 
Mo18 O64 2.397(7) . ? 
Cu1 O74 1.968(7) . ? 
Cu1 O74 1.968(7) 2_566 ? 
Cu1 O11 2.015(6) . ? 
Cu1 O11 2.015(6) 2_566 ? 
Cu1 O10 2.229(6) . ? 
Cu1 O10 2.230(6) 2_566 ? 
Sb1 O21 1.942(6) . ? 
Sb1 O8 1.961(6) . ? 
Sb1 O28 1.967(6) . ? 
Sb1 O27 1.981(6) . ? 
Sb1 O7 1.993(6) . ? 
Sb1 O24 2.049(6) . ? 
Sb2 O27 1.956(6) . ? 
Sb2 O50 1.956(6) . ? 
Sb2 O46 1.975(6) . ? 
Sb2 O47 1.984(6) . ? 
Sb2 O51 1.990(6) . ? 
Sb2 O57 2.008(6) . ? 
Sb3 O32 1.952(6) . ? 
Sb3 O31 1.955(6) . ? 
Sb3 O42 1.968(6) . ? 
Sb3 O46 1.973(6) . ? 
Sb3 O61 1.983(6) . ? 
Sb3 O60 2.000(6) . ? 
Sb4 O35 1.931(6) . ? 
Sb4 O38 1.954(6) . ? 
Sb4 O42 1.959(6) . ? 
Sb4 O39 1.991(6) . ? 
Sb4 O43 1.994(7) . ? 
Sb4 O64 2.050(6) . ? 
Sb5 O73 1.913(7) . ? 
Sb5 O60 1.983(6) . ? 
Sb5 O64 2.077(6) . ? 
Sb6 O73 1.963(7) . ? 
Sb6 O61 2.019(6) . ? 
Sb6 O63 2.112(6) . ? 
 
loop_ 
 _geom_angle_atom_site_label_1 
 _geom_angle_atom_site_label_2 
 _geom_angle_atom_site_label_3 
 _geom_angle 
 _geom_angle_site_symmetry_1 
 _geom_angle_site_symmetry_3 
 _geom_angle_publ_flag 
O1 Mo1 O2 105.0(4) . . ? 
O1 Mo1 O25 96.5(3) . . ? 
O2 Mo1 O25 100.3(3) . . ? 
O1 Mo1 O5 100.1(4) . . ? 
O2 Mo1 O5 98.1(3) . . ? 
O25 Mo1 O5 151.1(3) . . ? 
O1 Mo1 O8 155.1(3) . . ? 
O2 Mo1 O8 99.0(3) . . ? 
O25 Mo1 O8 72.5(2) . . ? 
O5 Mo1 O8 82.7(3) . . ? 
O1 Mo1 O24 87.9(3) . . ? 
O2 Mo1 O24 165.0(3) . . ? 
O25 Mo1 O24 85.6(3) . . ? 
O5 Mo1 O24 71.6(3) . . ? 
O8 Mo1 O24 69.4(2) . . ? 
O4 Mo2 O3 104.9(4) . . ? 
O4 Mo2 O5 99.5(4) . . ? 
O3 Mo2 O5 100.3(4) . . ? 
O4 Mo2 O23 98.7(3) . . ? 
O3 Mo2 O23 94.9(4) . . ? 
O5 Mo2 O23 152.4(3) . . ? 
O4 Mo2 O7 97.4(3) . . ? 
O3 Mo2 O7 155.7(3) . . ? 
O5 Mo2 O7 85.1(3) . . ? 
O23 Mo2 O7 72.0(2) . . ? 
O4 Mo2 O24 165.0(3) . . ? 
O3 Mo2 O24 89.1(3) . . ? 
O5 Mo2 O24 72.3(3) . . ? 
O23 Mo2 O24 85.1(3) . . ? 
O7 Mo2 O24 69.8(2) . . ? 
O29 Mo3 O9 104.4(4) . . ? 
O29 Mo3 O20 101.2(3) . . ? 
O9 Mo3 O20 99.6(3) . . ? 
O29 Mo3 O25 96.2(3) . . ? 
O9 Mo3 O25 98.5(3) . . ? 
O20 Mo3 O25 150.7(3) . . ? 
O29 Mo3 O8 156.5(3) . . ? 
O9 Mo3 O8 98.0(3) . . ? 
O20 Mo3 O8 81.7(2) . . ? 
O25 Mo3 O8 73.2(3) . . ? 
O29 Mo3 O28 87.8(3) . . ? 
O9 Mo3 O28 167.8(3) . . ? 
O20 Mo3 O28 77.0(2) . . ? 
O25 Mo3 O28 80.4(3) . . ? 
O8 Mo3 O28 69.9(2) . . ? 
O6 Mo4 O26 104.5(3) . . ? 
O6 Mo4 O22 98.7(3) . . ? 
O26 Mo4 O22 101.6(3) . . ? 
O6 Mo4 O23 94.9(3) . . ? 
O26 Mo4 O23 95.0(3) . . ? 
O22 Mo4 O23 155.1(3) . . ? 
O6 Mo4 O7 99.1(3) . . ? 
O26 Mo4 O7 154.6(3) . . ? 
O22 Mo4 O7 83.8(3) . . ? 
O23 Mo4 O7 73.4(3) . . ? 
O6 Mo4 O27 170.2(3) . . ? 
O26 Mo4 O27 85.1(3) . . ? 
O22 Mo4 O27 81.1(2) . . ? 
O23 Mo4 O27 82.0(3) . . ? 
O7 Mo4 O27 71.1(2) . . ? 
O19 Mo5 O11 101.7(3) . . ? 
O19 Mo5 O20 101.4(3) . . ? 
O11 Mo5 O20 97.6(3) . . ? 
O19 Mo5 O18 95.9(3) . . ? 
O11 Mo5 O18 94.3(3) . . ? 
O20 Mo5 O18 156.5(2) . . ? 
O19 Mo5 O21 162.8(3) . . ? 
O11 Mo5 O21 92.7(3) . . ? 
O20 Mo5 O21 85.9(3) . . ? 
O18 Mo5 O21 73.3(2) . . ? 
O19 Mo5 O31 87.0(3) . . ? 
O11 Mo5 O31 171.2(3) . . ? 
O20 Mo5 O31 81.7(2) . . ? 
O18 Mo5 O31 83.5(2) . . ? 
O21 Mo5 O31 78.6(2) . . ? 
O17 Mo6 O10 105.8(3) . . ? 
O17 Mo6 O18 99.6(3) . . ? 
O10 Mo6 O18 96.3(3) . . ? 
O17 Mo6 O22 96.9(3) . . ? 
O10 Mo6 O22 96.5(3) . . ? 
O18 Mo6 O22 155.5(2) . . ? 
O17 Mo6 O21 163.9(3) . . ? 
O10 Mo6 O21 89.7(3) . . ? 
O18 Mo6 O21 73.7(2) . . ? 
O22 Mo6 O21 85.6(2) . . ? 
O17 Mo6 O32 86.7(3) . . ? 
O10 Mo6 O32 167.4(3) . . ? 
O18 Mo6 O32 83.4(2) . . ? 
O22 Mo6 O32 79.6(2) . . ? 
O21 Mo6 O32 78.0(2) . . ? 
O12 Mo7 O16 103.0(4) . . ? 
O12 Mo7 O36 99.4(3) . . ? 
O16 Mo7 O36 100.6(4) . . ? 
O12 Mo7 O13 96.4(3) . . ? 
O16 Mo7 O13 97.3(3) . . ? 
O36 Mo7 O13 152.7(3) . . ? 
O12 Mo7 O35 158.2(3) . . ? 
O16 Mo7 O35 97.1(3) . . ? 
O36 Mo7 O35 84.8(3) . . ? 
O13 Mo7 O35 72.6(2) . . ? 
O12 Mo7 O19 83.0(3) . . ? 
O16 Mo7 O19 170.3(3) . . ? 
O36 Mo7 O19 85.7(3) . . ? 
O13 Mo7 O19 74.3(3) . . ? 
O35 Mo7 O19 76.0(2) . . ? 
O15 Mo8 O14 104.3(4) . . ? 
O15 Mo8 O13 101.2(3) . . ? 
O14 Mo8 O13 97.9(3) . . ? 
O15 Mo8 O34 95.9(3) . . ? 
O14 Mo8 O34 96.9(3) . . ? 
O13 Mo8 O34 153.8(3) . . ? 
O15 Mo8 O35 96.6(3) . . ? 
O14 Mo8 O35 158.8(3) . . ? 
O13 Mo8 O35 73.9(3) . . ? 
O34 Mo8 O35 84.6(2) . . ? 
O44 Mo9 O37 103.9(4) . . ? 
O44 Mo9 O36 99.9(4) . . ? 
O37 Mo9 O36 100.3(3) . . ? 
O44 Mo9 O65 94.5(4) . . ? 
O37 Mo9 O65 99.4(3) . . ? 
O36 Mo9 O65 151.9(3) . . ? 
O44 Mo9 O38 158.6(3) . . ? 
O37 Mo9 O38 95.7(3) . . ? 
O36 Mo9 O38 84.5(3) . . ? 
O65 Mo9 O38 73.7(3) . . ? 
O44 Mo9 O43 89.6(3) . . ? 
O37 Mo9 O43 166.4(3) . . ? 
O36 Mo9 O43 75.4(3) . . ? 
O65 Mo9 O43 80.7(3) . . ? 
O38 Mo9 O43 71.2(2) . . ? 
O40 Mo10 O41 103.7(3) . . ? 
O40 Mo10 O34 101.2(3) . . ? 
O41 Mo10 O34 102.1(3) . . ? 
O40 Mo10 O39 95.1(3) . . ? 
O41 Mo10 O39 156.1(3) . . ? 
O34 Mo10 O39 88.3(3) . . ? 
O40 Mo10 O63 95.9(3) . . ? 
O41 Mo10 O63 89.5(3) . . ? 
O34 Mo10 O63 156.3(3) . . ? 
O39 Mo10 O63 73.7(2) . . ? 
O40 Mo10 O42 165.9(3) . . ? 
O41 Mo10 O42 89.4(3) . . ? 
O34 Mo10 O42 80.8(2) . . ? 
O39 Mo10 O42 70.9(2) . . ? 
O63 Mo10 O42 78.7(2) . . ? 
O40 Mo10 Sb4 130.3(2) . . ? 
O41 Mo10 Sb4 125.4(2) . . ? 
O34 Mo10 Sb4 77.4(2) . . ? 
O39 Mo10 Sb4 35.71(17) . . ? 
O63 Mo10 Sb4 79.03(19) . . ? 
O42 Mo10 Sb4 36.10(14) . . ? 
O30 Mo11 O59 104.5(3) . . ? 
O30 Mo11 O43 101.0(3) . . ? 
O59 Mo11 O43 97.6(3) . . ? 
O30 Mo11 O45 94.5(3) . . ? 
O59 Mo11 O45 89.3(3) . . ? 
O43 Mo11 O45 160.8(3) . . ? 
O30 Mo11 O31 99.2(3) . . ? 
O59 Mo11 O31 154.9(3) . . ? 
O43 Mo11 O31 85.8(3) . . ? 
O45 Mo11 O31 80.6(2) . . ? 
O30 Mo11 O60 170.0(3) . . ? 
O59 Mo11 O60 84.0(3) . . ? 
O43 Mo11 O60 82.7(2) . . ? 
O45 Mo11 O60 80.2(2) . . ? 
O31 Mo11 O60 71.7(2) . . ? 
O33 Mo12 O62 104.2(3) . . ? 
O33 Mo12 O47 101.2(3) . . ? 
O62 Mo12 O47 99.6(3) . . ? 
O33 Mo12 O32 101.0(3) . . ? 
O62 Mo12 O32 152.3(3) . . ? 
O47 Mo12 O32 86.4(2) . . ? 
O33 Mo12 O41 91.8(3) . . ? 
O62 Mo12 O41 88.0(3) . . ? 
O47 Mo12 O41 162.7(2) . . ? 
O32 Mo12 O41 79.9(2) . . ? 
O33 Mo12 O61 168.9(3) . . ? 
O62 Mo12 O61 81.4(3) . . ? 
O47 Mo12 O61 87.1(2) . . ? 
O32 Mo12 O61 71.9(2) . . ? 
O41 Mo12 O61 78.6(2) . . ? 
O33 Mo12 Sb3 135.7(2) . . ? 
O62 Mo12 Sb3 118.2(2) . . ? 
O47 Mo12 Sb3 84.38(18) . . ? 
O32 Mo12 Sb3 35.00(16) . . ? 
O41 Mo12 Sb3 78.37(17) . . ? 
O61 Mo12 Sb3 36.99(14) . . ? 
O52 Mo13 O45 103.6(3) . . ? 
O52 Mo13 O58 98.0(3) . . ? 
O45 Mo13 O58 96.1(3) . . ? 
O52 Mo13 O28 96.9(3) . . ? 
O45 Mo13 O28 96.9(3) . . ? 
O58 Mo13 O28 157.3(3) . . ? 
O52 Mo13 O51 98.6(3) . . ? 
O45 Mo13 O51 157.2(3) . . ? 
O58 Mo13 O51 75.4(2) . . ? 
O28 Mo13 O51 85.5(2) . . ? 
O52 Mo13 O46 169.3(3) . . ? 
O45 Mo13 O46 87.1(3) . . ? 
O58 Mo13 O46 80.8(2) . . ? 
O28 Mo13 O46 81.4(2) . . ? 
O51 Mo13 O46 70.7(2) . . ? 
O49 Mo14 O48 105.8(4) . . ? 
O49 Mo14 O56 101.5(3) . . ? 
O48 Mo14 O56 98.9(3) . . ? 
O49 Mo14 O26 94.8(3) . . ? 
O48 Mo14 O26 96.1(3) . . ? 
O56 Mo14 O26 153.9(3) . . ? 
O49 Mo14 O50 97.5(3) . . ? 
O48 Mo14 O50 156.7(3) . . ? 
O56 Mo14 O50 75.3(3) . . ? 
O26 Mo14 O50 82.4(3) . . ? 
O49 Mo14 O47 164.6(3) . . ? 
O48 Mo14 O47 87.6(3) . . ? 
O56 Mo14 O47 83.5(3) . . ? 
O26 Mo14 O47 75.8(2) . . ? 
O50 Mo14 O47 69.5(2) . . ? 
O72 Mo15 O53 106.9(5) . . ? 
O72 Mo15 O54 101.6(3) . . ? 
O53 Mo15 O54 98.1(4) . . ? 
O72 Mo15 O58 97.9(3) . . ? 
O53 Mo15 O58 98.5(3) . . ? 
O54 Mo15 O58 149.4(3) . . ? 
O72 Mo15 O51 154.8(4) . . ? 
O53 Mo15 O51 97.2(4) . . ? 
O54 Mo15 O51 81.9(3) . . ? 
O58 Mo15 O51 70.7(2) . . ? 
O72 Mo15 O57 86.6(3) . . ? 
O53 Mo15 O57 165.1(4) . . ? 
O54 Mo15 O57 72.2(3) . . ? 
O58 Mo15 O57 85.8(2) . . ? 
O51 Mo15 O57 70.6(2) . . ? 
O55 Mo16 O71 106.3(4) . . ? 
O55 Mo16 O54 96.4(3) . . ? 
O71 Mo16 O54 99.9(4) . . ? 
O55 Mo16 O56 100.3(3) . . ? 
O71 Mo16 O56 97.4(4) . . ? 
O54 Mo16 O56 151.4(3) . . ? 
O55 Mo16 O50 95.7(3) . . ? 
O71 Mo16 O50 157.1(4) . . ? 
O54 Mo16 O50 83.3(3) . . ? 
O56 Mo16 O50 72.1(3) . . ? 
O55 Mo16 O57 161.7(3) . . ? 
O71 Mo16 O57 89.7(3) . . ? 
O54 Mo16 O57 71.5(3) . . ? 
O56 Mo16 O57 86.1(3) . . ? 
O50 Mo16 O57 69.7(2) . . ? 
O66 Mo17 O70 107.3(4) . . ? 
O66 Mo17 O65 100.8(4) . . ? 
O70 Mo17 O65 96.4(4) . . ? 
O66 Mo17 O67 97.5(4) . . ? 
O70 Mo17 O67 98.7(4) . . ? 
O65 Mo17 O67 151.6(3) . . ? 
O66 Mo17 O38 99.1(3) . . ? 
O70 Mo17 O38 153.3(3) . . ? 
O65 Mo17 O38 74.1(3) . . ? 
O67 Mo17 O38 81.8(3) . . ? 
O66 Mo17 O64 166.0(3) . . ? 
O70 Mo17 O64 84.1(3) . . ? 
O65 Mo17 O64 85.6(3) . . ? 
O67 Mo17 O64 72.2(2) . . ? 
O38 Mo17 O64 70.5(2) . . ? 
O68 Mo18 O69 106.5(4) . . ? 
O68 Mo18 O67 98.6(3) . . ? 
O69 Mo18 O67 101.5(3) . . ? 
O68 Mo18 O63 100.8(3) . . ? 
O69 Mo18 O63 94.2(3) . . ? 
O67 Mo18 O63 150.3(3) . . ? 
O68 Mo18 O39 94.2(3) . . ? 
O69 Mo18 O39 157.2(3) . . ? 
O67 Mo18 O39 84.0(3) . . ? 
O63 Mo18 O39 72.4(2) . . ? 
O68 Mo18 O64 162.9(3) . . ? 
O69 Mo18 O64 90.0(3) . . ? 
O67 Mo18 O64 73.3(3) . . ? 
O63 Mo18 O64 81.8(2) . . ? 
O39 Mo18 O64 70.3(2) . . ? 
O74 Cu1 O74 179.999(2) . 2_566 ? 
O74 Cu1 O11 91.3(3) . . ? 
O74 Cu1 O11 88.7(3) 2_566 . ? 
O74 Cu1 O11 88.7(3) . 2_566 ? 
O74 Cu1 O11 91.3(3) 2_566 2_566 ? 
O11 Cu1 O11 179.999(2) . 2_566 ? 
O74 Cu1 O10 92.6(3) . . ? 
O74 Cu1 O10 87.4(3) 2_566 . ? 
O11 Cu1 O10 87.2(2) . . ? 
O11 Cu1 O10 92.8(2) 2_566 . ? 
O74 Cu1 O10 87.4(3) . 2_566 ? 
O74 Cu1 O10 92.6(3) 2_566 2_566 ? 
O11 Cu1 O10 92.8(2) . 2_566 ? 
O11 Cu1 O10 87.2(2) 2_566 2_566 ? 
O10 Cu1 O10 179.998(2) . 2_566 ? 
O21 Sb1 O8 93.3(3) . . ? 
O21 Sb1 O28 96.0(3) . . ? 
O8 Sb1 O28 87.2(2) . . ? 
O21 Sb1 O27 95.7(3) . . ? 
O8 Sb1 O27 170.1(3) . . ? 
O28 Sb1 O27 96.1(2) . . ? 
O21 Sb1 O7 94.0(3) . . ? 
O8 Sb1 O7 93.9(2) . . ? 
O28 Sb1 O7 169.8(3) . . ? 
O27 Sb1 O7 81.3(2) . . ? 
O21 Sb1 O24 172.1(2) . . ? 
O8 Sb1 O24 81.6(3) . . ? 
O28 Sb1 O24 89.8(3) . . ? 
O27 Sb1 O24 89.1(3) . . ? 
O7 Sb1 O24 80.4(3) . . ? 
O27 Sb2 O50 90.9(2) . . ? 
O27 Sb2 O46 93.4(2) . . ? 
O50 Sb2 O46 174.8(3) . . ? 
O27 Sb2 O47 93.4(3) . . ? 
O50 Sb2 O47 83.3(3) . . ? 
O46 Sb2 O47 99.4(3) . . ? 
O27 Sb2 O51 91.8(3) . . ? 
O50 Sb2 O51 95.7(3) . . ? 
O46 Sb2 O51 81.2(2) . . ? 
O47 Sb2 O51 174.7(3) . . ? 
O27 Sb2 O57 172.5(3) . . ? 
O50 Sb2 O57 83.6(2) . . ? 
O46 Sb2 O57 92.0(2) . . ? 
O47 Sb2 O57 90.9(3) . . ? 
O51 Sb2 O57 83.8(3) . . ? 
O32 Sb3 O31 106.1(2) . . ? 
O32 Sb3 O42 90.5(2) . . ? 
O31 Sb3 O42 90.4(2) . . ? 
O32 Sb3 O46 90.7(2) . . ? 
O31 Sb3 O46 90.3(2) . . ? 
O42 Sb3 O46 178.4(2) . . ? 
O32 Sb3 O61 80.1(2) . . ? 
O31 Sb3 O61 173.8(2) . . ? 
O42 Sb3 O61 88.6(2) . . ? 
O46 Sb3 O61 90.6(2) . . ? 
O32 Sb3 O60 173.4(2) . . ? 
O31 Sb3 O60 80.5(2) . . ? 
O42 Sb3 O60 89.3(2) . . ? 
O46 Sb3 O60 89.4(2) . . ? 
O61 Sb3 O60 93.3(2) . . ? 
O32 Sb3 Mo12 37.41(16) . . ? 
O31 Sb3 Mo12 143.43(17) . . ? 
O42 Sb3 Mo12 91.32(18) . . ? 
O46 Sb3 Mo12 88.96(17) . . ? 
O61 Sb3 Mo12 42.78(16) . . ? 
O60 Sb3 Mo12 136.03(17) . . ? 
O35 Sb4 O38 95.1(3) . . ? 
O35 Sb4 O42 92.2(2) . . ? 
O38 Sb4 O42 171.2(3) . . ? 
O35 Sb4 O39 95.1(3) . . ? 
O38 Sb4 O39 95.0(3) . . ? 
O42 Sb4 O39 79.6(2) . . ? 
O35 Sb4 O43 94.9(3) . . ? 
O38 Sb4 O43 85.1(3) . . ? 
O42 Sb4 O43 99.1(3) . . ? 
O39 Sb4 O43 169.9(2) . . ? 
O35 Sb4 O64 176.8(3) . . ? 
O38 Sb4 O64 83.4(3) . . ? 
O42 Sb4 O64 89.0(2) . . ? 
O39 Sb4 O64 82.2(2) . . ? 
O43 Sb4 O64 87.8(3) . . ? 
O35 Sb4 Mo10 87.91(19) . . ? 
O38 Sb4 Mo10 132.3(2) . . ? 
O42 Sb4 Mo10 43.08(18) . . ? 
O39 Sb4 Mo10 37.53(17) . . ? 
O43 Sb4 Mo10 142.14(18) . . ? 
O64 Sb4 Mo10 91.00(17) . . ? 
O73 Sb5 O60 97.4(3) . . ? 
O73 Sb5 O64 92.6(3) . . ? 
O60 Sb5 O64 91.6(2) . . ? 
O73 Sb6 O61 95.4(3) . . ? 
O73 Sb6 O63 94.3(3) . . ? 
O61 Sb6 O63 90.7(2) . . ? 
Mo2 O5 Mo1 122.0(4) . . ? 
Sb1 O7 Mo4 106.3(3) . . ? 
Sb1 O7 Mo2 109.2(3) . . ? 
Mo4 O7 Mo2 97.6(2) . . ? 
Sb1 O8 Mo3 106.1(3) . . ? 
Sb1 O8 Mo1 108.7(3) . . ? 
Mo3 O8 Mo1 94.5(2) . . ? 
Mo6 O10 Cu1 138.0(3) . . ? 
Mo5 O11 Cu1 144.9(4) . . ? 
Mo8 O13 Mo7 113.1(3) . . ? 
Mo6 O18 Mo5 111.0(3) . . ? 
Mo5 O19 Mo7 145.9(4) . . ? 
Mo5 O20 Mo3 157.8(4) . . ? 
Sb1 O21 Mo5 130.1(3) . . ? 
Sb1 O21 Mo6 130.9(3) . . ? 
Mo5 O21 Mo6 97.8(2) . . ? 
Mo4 O22 Mo6 155.8(4) . . ? 
Mo4 O23 Mo2 111.7(3) . . ? 
Sb1 O24 Mo2 100.4(3) . . ? 
Sb1 O24 Mo1 100.3(2) . . ? 
Mo2 O24 Mo1 90.6(2) . . ? 
Mo3 O25 Mo1 113.8(3) . . ? 
Mo4 O26 Mo14 160.3(4) . . ? 
Sb2 O27 Sb1 130.1(3) . . ? 
Sb2 O27 Mo4 128.6(3) . . ? 
Sb1 O27 Mo4 99.6(2) . . ? 
Mo13 O28 Sb1 143.6(3) . . ? 
Mo13 O28 Mo3 120.5(3) . . ? 
Sb1 O28 Mo3 95.4(2) . . ? 
Sb3 O31 Mo11 107.9(3) . . ? 
Sb3 O31 Mo5 128.4(3) . . ? 
Mo11 O31 Mo5 122.3(3) . . ? 
Sb3 O32 Mo12 107.6(3) . . ? 
Sb3 O32 Mo6 127.5(3) . . ? 
Mo12 O32 Mo6 123.9(3) . . ? 
Mo10 O34 Mo8 156.2(4) . . ? 
Sb4 O35 Mo7 130.5(3) . . ? 
Sb4 O35 Mo8 133.6(3) . . ? 
Mo7 O35 Mo8 95.8(2) . . ? 
Mo7 O36 Mo9 160.3(4) . . ? 
Sb4 O38 Mo9 104.5(3) . . ? 
Sb4 O38 Mo17 107.6(3) . . ? 
Mo9 O38 Mo17 94.7(2) . . ? 
Sb4 O39 Mo10 106.8(3) . . ? 
Sb4 O39 Mo18 107.8(3) . . ? 
Mo10 O39 Mo18 100.5(2) . . ? 
Mo10 O41 Mo12 151.9(4) . . ? 
Sb4 O42 Sb3 129.9(3) . . ? 
Sb4 O42 Mo10 100.8(2) . . ? 
Sb3 O42 Mo10 128.0(3) . . ? 
Mo11 O43 Sb4 137.7(3) . . ? 
Mo11 O43 Mo9 124.0(3) . . ? 
Sb4 O43 Mo9 97.7(3) . . ? 
Mo13 O45 Mo11 153.9(4) . . ? 
Sb3 O46 Sb2 130.2(3) . . ? 
Sb3 O46 Mo13 129.1(3) . . ? 
Sb2 O46 Mo13 100.0(2) . . ? 
Mo12 O47 Sb2 136.4(3) . . ? 
Mo12 O47 Mo14 124.3(3) . . ? 
Sb2 O47 Mo14 98.8(2) . . ? 
Sb2 O50 Mo14 108.1(3) . . ? 
Sb2 O50 Mo16 106.2(3) . . ? 
Mo14 O50 Mo16 93.3(2) . . ? 
Sb2 O51 Mo13 107.7(3) . . ? 
Sb2 O51 Mo15 104.2(3) . . ? 
Mo13 O51 Mo15 94.9(2) . . ? 
Mo15 O54 Mo16 120.5(4) . . ? 
Mo14 O56 Mo16 114.1(3) . . ? 
Sb2 O57 Mo15 101.4(3) . . ? 
Sb2 O57 Mo16 100.4(3) . . ? 
Mo15 O57 Mo16 90.8(2) . . ? 
Mo13 O58 Mo15 113.4(3) . . ? 
Sb5 O60 Sb3 136.9(3) . . ? 
Sb5 O60 Mo11 112.4(3) . . ? 
Sb3 O60 Mo11 99.9(2) . . ? 
Sb3 O61 Sb6 137.3(3) . . ? 
Sb3 O61 Mo12 100.2(2) . . ? 
Sb6 O61 Mo12 113.1(3) . . ? 
Mo18 O63 Mo10 106.7(3) . . ? 
Mo18 O63 Sb6 124.6(3) . . ? 
Mo10 O63 Sb6 126.8(3) . . ? 
Sb4 O64 Sb5 125.6(3) . . ? 
Sb4 O64 Mo17 98.5(2) . . ? 
Sb5 O64 Mo17 111.2(3) . . ? 
Sb4 O64 Mo18 99.4(2) . . ? 
Sb5 O64 Mo18 124.6(3) . . ? 
Mo17 O64 Mo18 89.0(2) . . ? 
Mo17 O65 Mo9 112.9(4) . . ? 
Mo18 O67 Mo17 121.3(4) . . ? 
Sb5 O73 Sb6 137.0(3) . . ? 
 
_diffrn_measured_fraction_theta_max    0.983 
_diffrn_reflns_theta_full              25.10 
_diffrn_measured_fraction_theta_full   0.983 
_refine_diff_density_max    2.142 
_refine_diff_density_min   -3.585 
_refine_diff_density_rms    0.238 
